# Supplementary material for: Genetic analysis of a rabies virus host shift event reveals within-host viral dynamics in a new host
Source: PubMed Central journal article supplement — Virus Evol. 2017 Dec 13;3(2):vex038. doi: 10.1093/ve/vex038 (PMC5729694; doi:10.1093/ve/vex038), 2017-12-13

**Fig S1: Read depth of coverage across genome for a selection of eight host shift viruses representing the range of total viral reads obtained in the total dataset.**

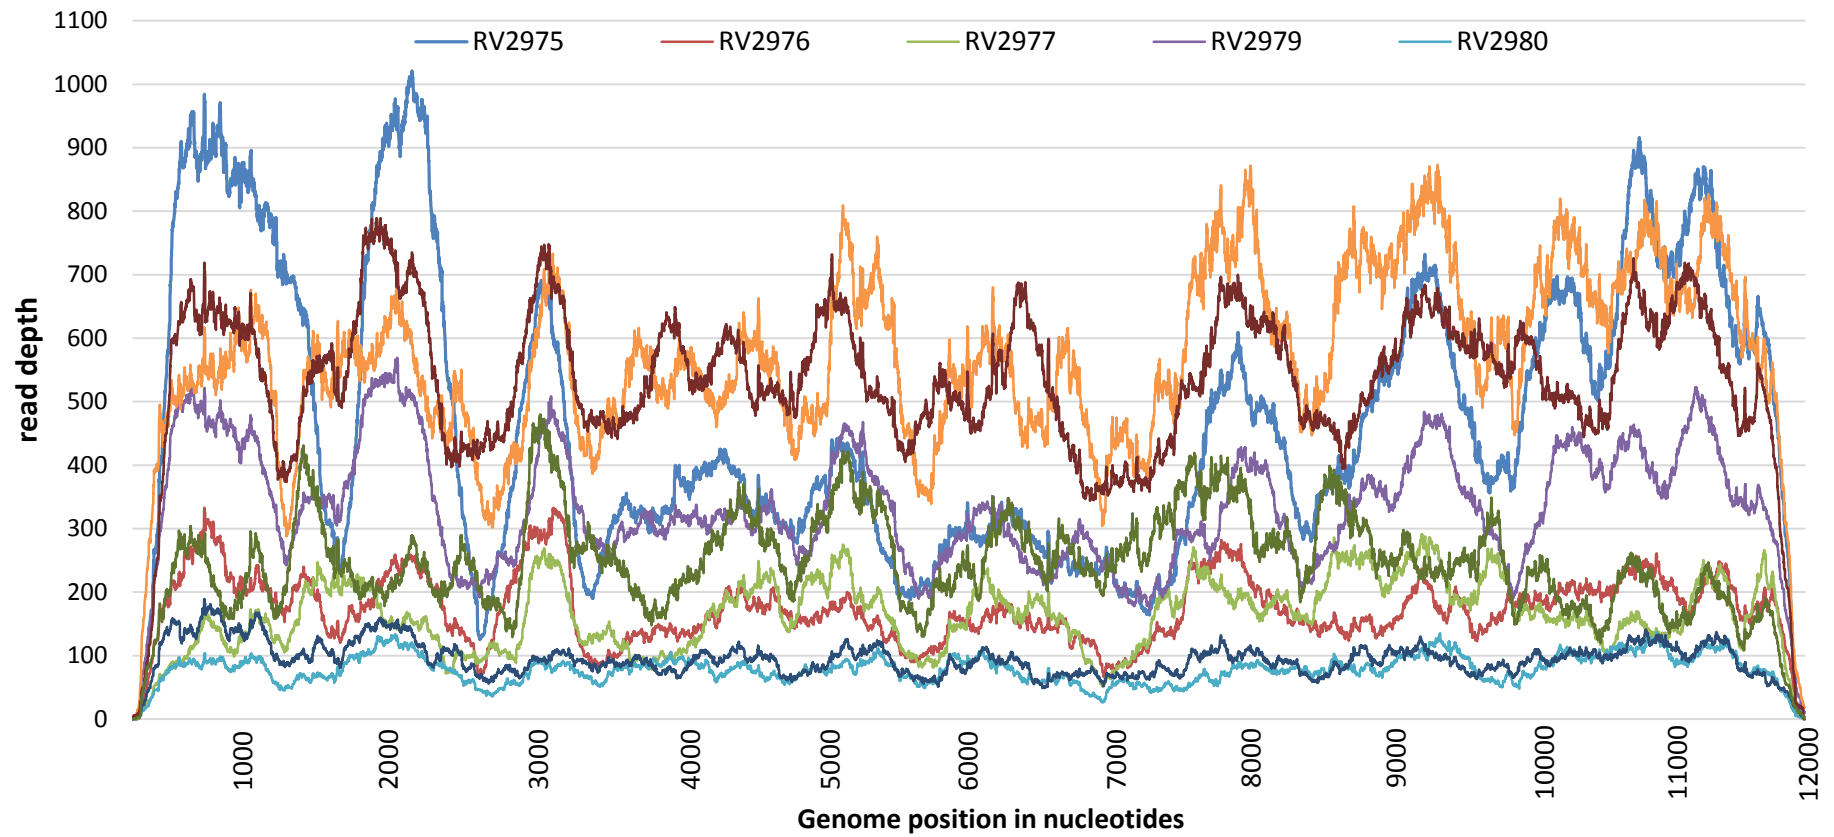

Supplement: vex038_supp_sf_1.pdf [file vex038_supp_sf_1.pdf]
