# Supplementary material for: Genetic analysis of a rabies virus host shift event reveals within-host viral dynamics in a new host
Source: PubMed Central journal article supplement — Virus Evol. 2017 Dec 13;3(2):vex038. doi: 10.1093/ve/vex038 (PMC5729694; doi:10.1093/ve/vex038), 2017-12-13

**Fig S2: Bayesian Maximum clade credibility phylogeny of 400bp nucleoprotein gene from RABVs from Turkey and neighbouring countries in the Middle East.** The defined Middle East clades are labelled according to previous studies (Horton *et al* 2015), unlabelled viruses included to add context and include viruses from Europe and Africa. Posterior probabilities are indicated at each node. Turkey sequences are predominantly within clade C and are enlarged in the inset box.

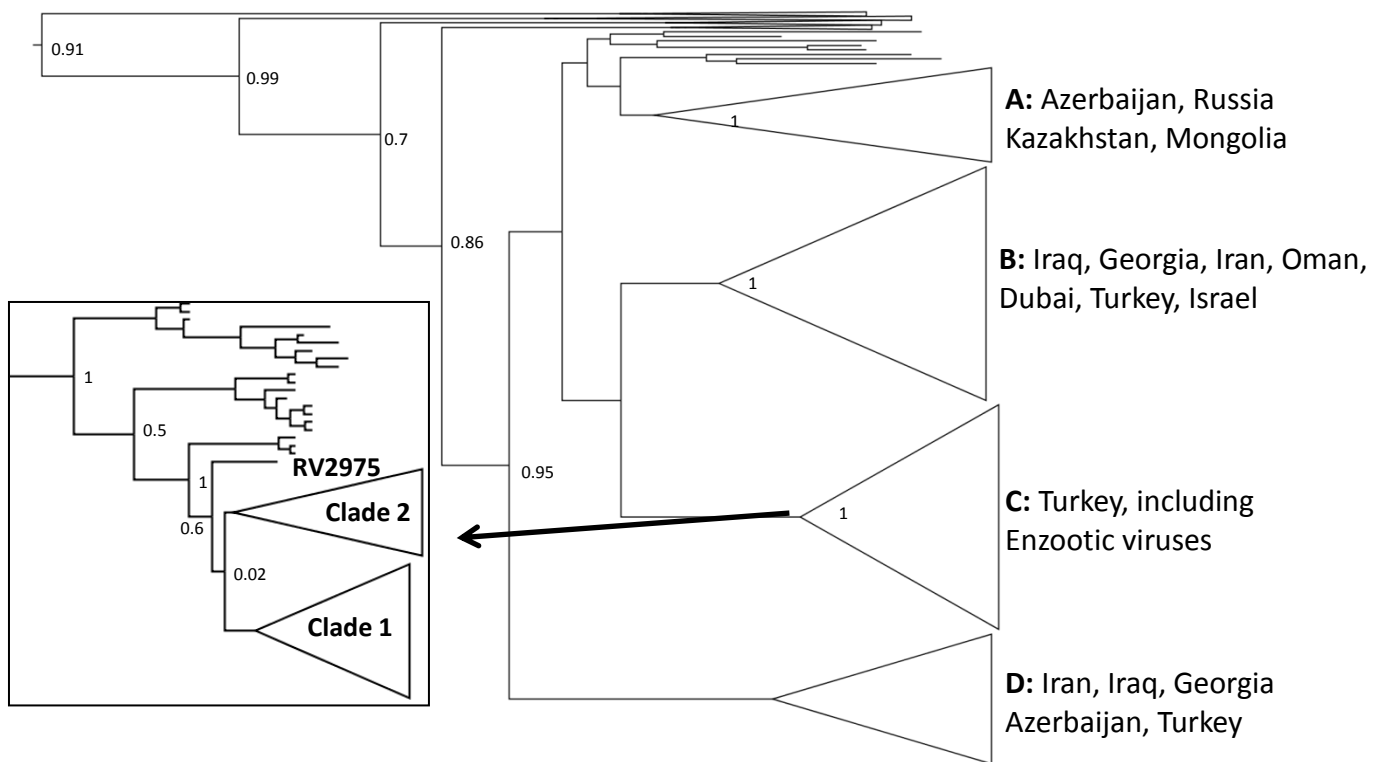

Supplement: vex038_supp_sf_2.pdf [file vex038_supp_sf_2.pdf]
