# Supplementary material for: Genetic analysis of a rabies virus host shift event reveals within-host viral dynamics in a new host
Source: PubMed Central journal article supplement — Virus Evol. 2017 Dec 13;3(2):vex038. doi: 10.1093/ve/vex038 (PMC5729694; doi:10.1093/ve/vex038), 2017-12-13

**Fig S3: dN/dS ratios of consensus sequences using RV303 as reference, across all Turkey viruses ordered by collection date. (A) Individual genes, (B) average dN/dS ratios across all 5 genes. Viruses divided into following groups; pre-host shift (triangle), early phase (circle), late phase (square). Fox samples (black), dog samples (grey).**

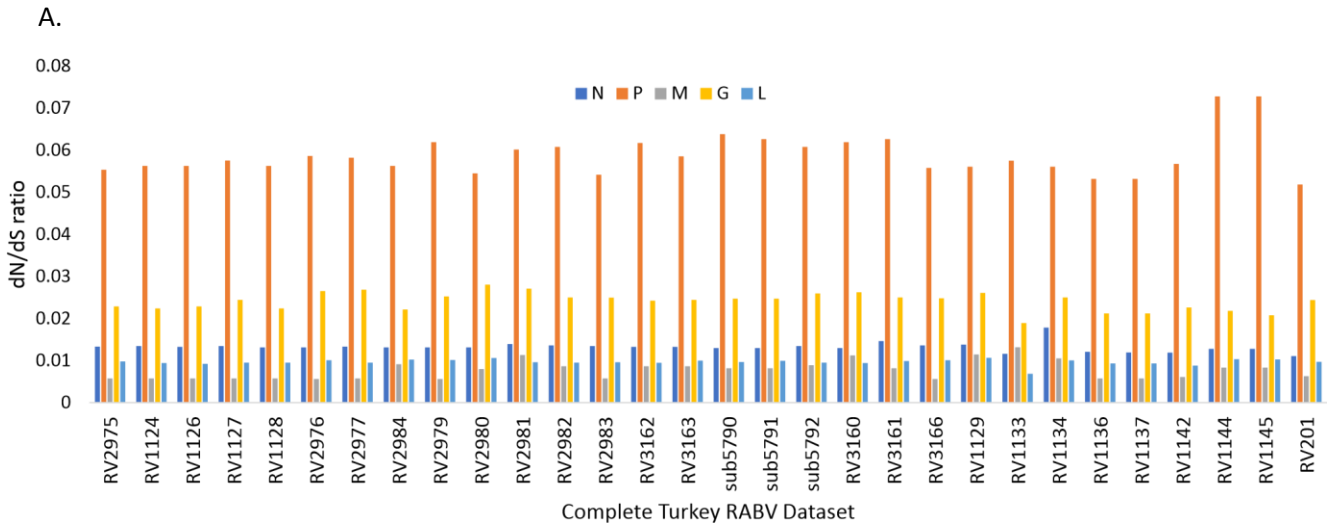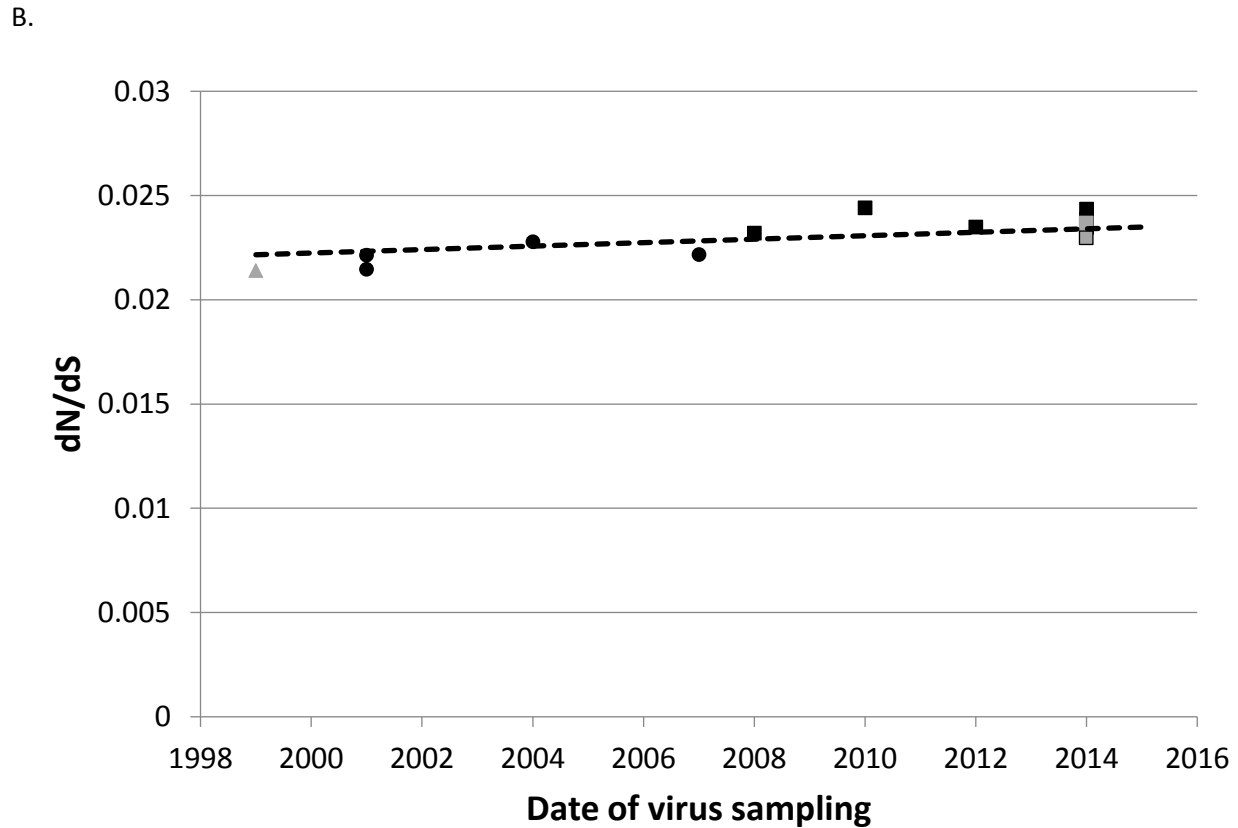

Supplement: vex038_supp_sf_3.pdf [file vex038_supp_sf_3.pdf]
