# Supplementary material for: Genetic analysis of a rabies virus host shift event reveals within-host viral dynamics in a new host
Source: PubMed Central journal article supplement — Virus Evol. 2017 Dec 13;3(2):vex038. doi: 10.1093/ve/vex038 (PMC5729694; doi:10.1093/ve/vex038), 2017-12-13

**Fig S5: Graphical representation of sub consensus heterogeneity using H Index for all viruses with viral reads >25,000.** All Turkey viruses grouped as follows: pre-host shift (triangle), early phase (circle), late phase (square), and non-host shift from Turkey (diamond). Trend lines for early and late phase viruses indicated by dashed line. Fox samples (black), dog samples (grey). Unpaired t-test  $p < 0.001^{***}$ ,  $p < 0.05^{**}$ .

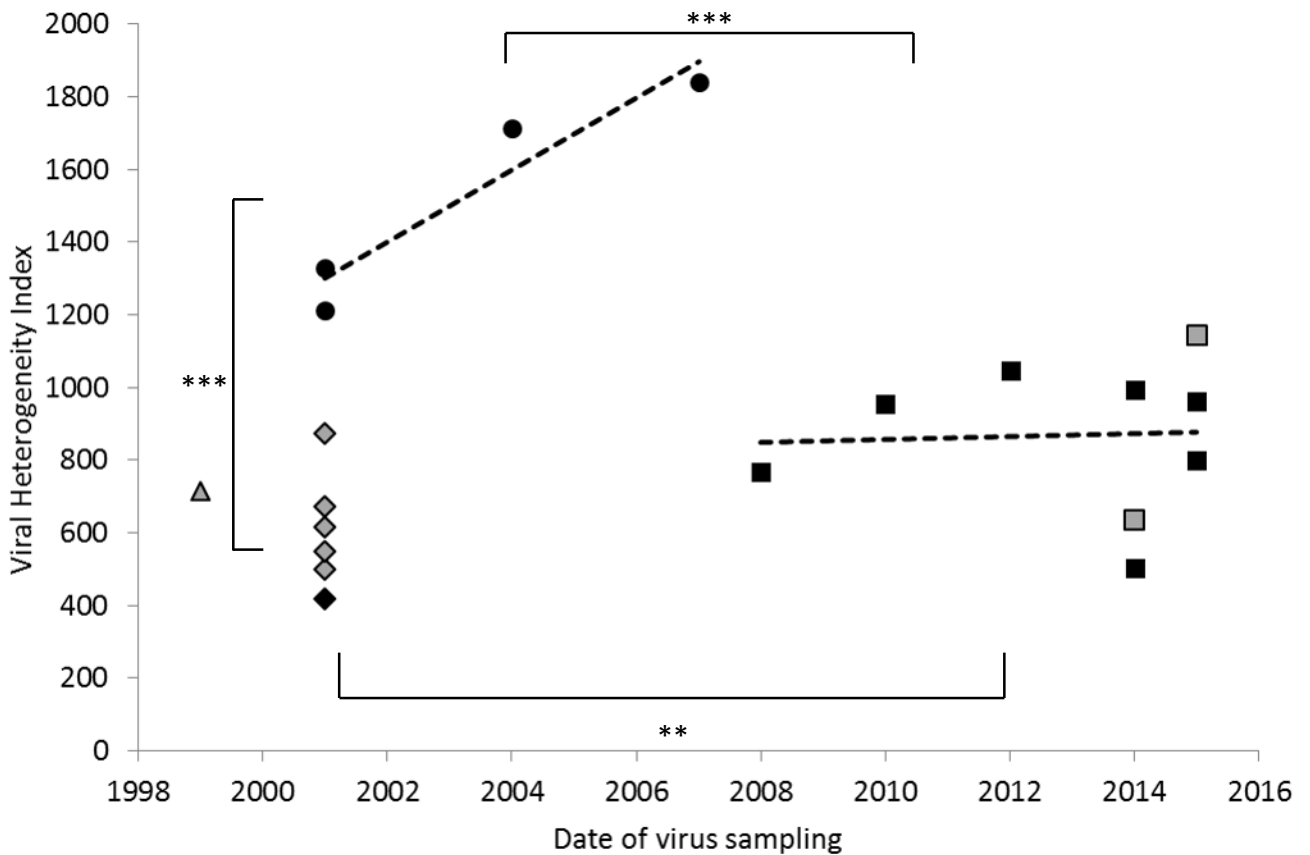

Supplement: vex038_supp_sf_5.pdf [file vex038_supp_sf_5.pdf]
