# Supplementary material for: Genetic analysis of a rabies virus host shift event reveals within-host viral dynamics in a new host
Source: PubMed Central journal article supplement — Virus Evol. 2017 Dec 13;3(2):vex038. doi: 10.1093/ve/vex038 (PMC5729694; doi:10.1093/ve/vex038), 2017-12-13

**Fig S6: dN/dS ratios of sub-viral population across all viruses ordered by collection date, with viral reads >25,000. (A) Individual genes from host shift viruses, (B) individual genes from non-host shift viruses and pre-host shift virus RV2975D Izmir. (C) Average dN/dS ratios of host shift viruses, plotted against time, across all genes, pre- host shift virus RV2975D Izmir (triangle), early phase viruses (circle), late phase viruses (square). Fox samples (black), dog samples (grey).**

A.

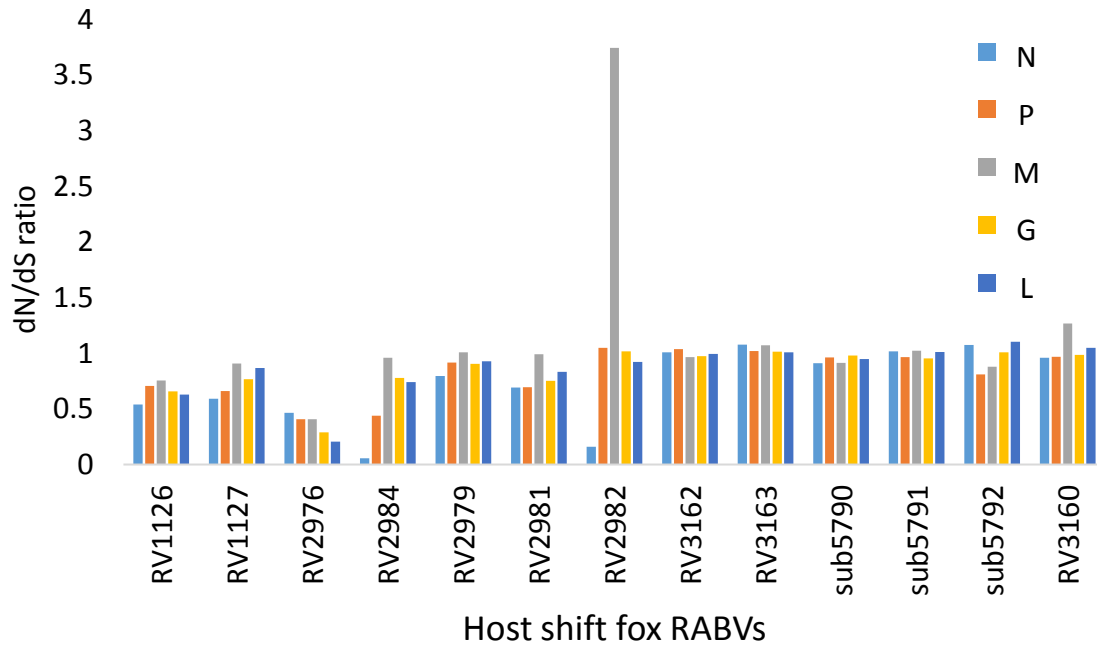

B.

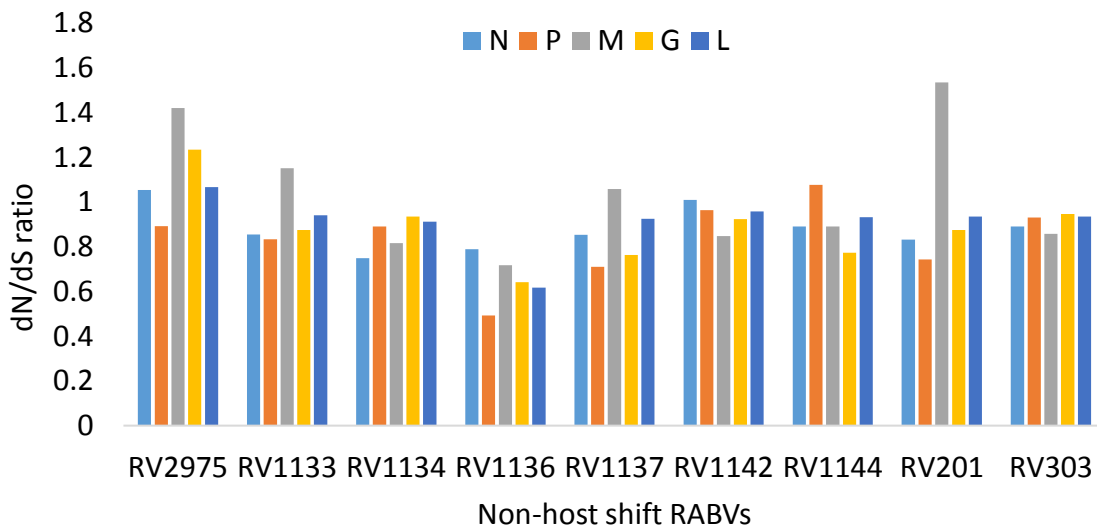

C.

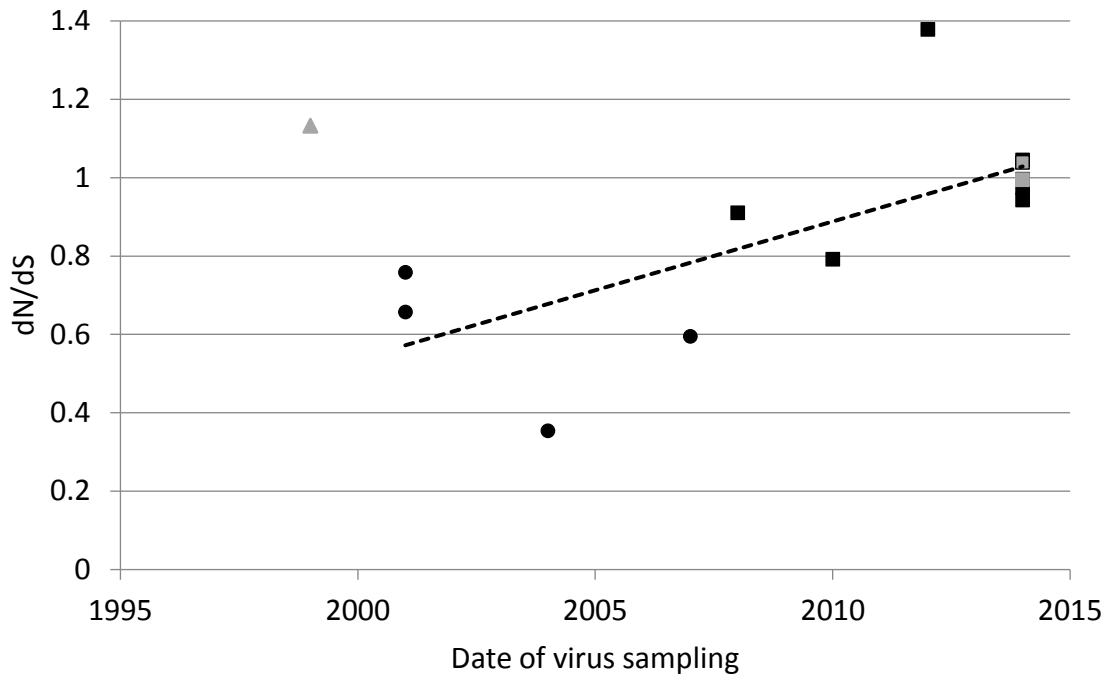

Supplement: vex038_supp_sf_6.pdf [file vex038_supp_sf_6.pdf]
