# Supplementary material for: Genetic analysis of a rabies virus host shift event reveals within-host viral dynamics in a new host
Source: PubMed Central journal article supplement — Virus Evol. 2017 Dec 13;3(2):vex038. doi: 10.1093/ve/vex038 (PMC5729694; doi:10.1093/ve/vex038), 2017-12-13
Supplement: vex038_supp_st_1.pdf [file vex038_supp_st_1.pdf]

**Table S1: All virus samples with NGS read data**

| ID       | Area     | Year | Viral Reads | % viral reads | Average depth coverage | % genome covered |
|----------|----------|------|-------------|---------------|------------------------|------------------|
| RV2975D* | Izmir    | 1999 | 48,801      | 0.532         | 863                    | 99.9             |
| RV1124F  | Izmir    | 1999 | 17,010      | 0.24          | 300                    | 100              |
| RV1126F  | Izmir    | 2001 | 27,740      | 0.26          | 261                    | 100              |
| RV1127F  | Manisa   | 2001 | 125,950     | 5.395         | 1225                   | 100              |
| RV1128F  | Manisa   | 2001 | 15,435      | 0.18          | 161                    | 100              |
| RV2976F  | Denizli  | 2004 | 30,993      | 1             | 341                    | 99.9             |
| RV2977F  | Izmir    | 2006 | 20,791      | 0.31          | 225                    | 100              |
| RV2984F  | Izmir    | 2007 | 45,162      | 4.771         | 361                    | 99.8             |
| RV2979F  | Kutahya  | 2008 | 31,332      | 0.257         | 571                    | 100              |
| RV2980F  | Manisa   | 2009 | 10,845      | 0.22          | 118                    | 99.9             |
| RV2981F  | Izmir    | 2010 | 113,385     | 5.526         | 1070                   | 100              |
| RV2982F  | Ankara   | 2012 | 54,074      | 0.83          | 578                    | 100              |
| RV2983F  | Manisa   | 2012 | 11,565      | 0.438         | 176                    | 99.9             |
| RV3162F  | Aksaray  | 2014 | 77,904      | 3.5           | 777                    | 100              |
| RV3163D  | Aksaray  | 2014 | 30,321      | 1.45          | 338                    | 100              |
| Sub5790F | Cubuk    | 2015 | 79,651      | 3.17          | 760                    | 100              |
| Sub5791D | Cubuk    | 2015 | 318,799     | 17.65         | 2,795                  | 100              |
| Sub5792F | Yahsiyan | 2014 | 43,663      | 2.01          | 484                    | 100              |
| RV3160F  | Eregli   | 2015 | 95,237      | 3.65          | 1030                   | 100              |
| RV3161D  | Eregli   | 2015 | 21,225      | 1             | 242                    | 100              |
| RV3166F  | Boztepe  | 2015 | 11,945      | 0.26          | 55                     | 100              |
| RV1145F  | Erzurum  | 2000 | 13,552      | 0.35          | 143                    | 100              |
| RV1144F  | Erzurum  | 2001 | 33,268      | 0.79          | 376                    | 99.9             |
| RV1129F  | Erzurum  | 2001 | 8,408       | 0.19          | 97                     | 99.9             |
| RV1136D  | Bursa    | 2001 | 27,835      | 1.2           | 308                    | 100              |
| RV1137D  | Bursa    | 2001 | 43,891      | 1.36          | 490                    | 100              |
| RV1142D  | Istanbul | 2001 | 140,830     | 3.3           | 1438                   | 100              |
| RV1133D  | Ardahan  | 2001 | 450,449     | 8.7           | 3797                   | 100              |
| RV1134D  | Ardahan  | 2001 | 169,262     | 3.15          | 1698                   | 100              |

Samples are listed in date / location order and divided as follows: RV2975\* pre-host-shift canine RABV; host-shift dataset, 20 isolates (17 fox and 3 dog) subdivided by dashed line to indicate early (green) and late (red) phases of the host shift; and non-host shift (blue) from other regions of Turkey
