# Supplementary material for: Genetic analysis of a rabies virus host shift event reveals within-host viral dynamics in a new host
Source: PubMed Central journal article supplement — Virus Evol. 2017 Dec 13;3(2):vex038. doi: 10.1093/ve/vex038 (PMC5729694; doi:10.1093/ve/vex038), 2017-12-13
Supplement: vex038_supp_st_2.pdf [file vex038_supp_st_2.pdf]

**Table S2: Coding and non-coding lengths for the Turkey RABV genome sequence dataset.**

| Region     | Length in nucleotides (nts)           |                        |
|------------|---------------------------------------|------------------------|
|            | Clade 1<br>(and other Turkey genomes) | Clade 2                |
| 3' UTR     | 70                                    | 70                     |
| N protein  | 1353                                  | 1353                   |
| N-P        | 90                                    | 90                     |
| P protein  | 894                                   | 894                    |
| P-M        | 88                                    | 88                     |
| M protein  | 609                                   | 609                    |
| <b>M-G</b> | <b>211</b>                            | <b>212</b>             |
| G protein  | 1575                                  | 1575                   |
| <b>G-L</b> | <b>518</b>                            | <b>518<sup>^</sup></b> |
| L protein  | 6384                                  | 6384                   |
| 5' UTR     | 131                                   | 131                    |
| Total      | 11923 (10,815)                        | 11924-5 (10,815)       |

The total genome length is indicated, concatenated coding length in brackets. The regions with differences between the dataset are in bold. All clade 2 viruses have an extra base (A) at position 3193 in the M-G intergenic region (See Table 3 for deep sequence analysis of this position). <sup>^</sup>RV3160F and Sub5792D have extra base (A) at position 5348 (See Table S5 for deep sequence analysis of this position).
