# Supplementary material for: Genetic analysis of a rabies virus host shift event reveals within-host viral dynamics in a new host
Source: PubMed Central journal article supplement — Virus Evol. 2017 Dec 13;3(2):vex038. doi: 10.1093/ve/vex038 (PMC5729694; doi:10.1093/ve/vex038), 2017-12-13
Supplement: vex038_supp_st_3.pdf [file vex038_supp_st_3.pdf]

**Table S3: Deep sequence data for position 3192, a homopolymeric region of either 5 or 6 As in the M-G intergenic region.**

| RABV ID   | Read depth coverage | 4 As | 5 A's Clade 1 | 6 A's Clade 2 |
|-----------|---------------------|------|---------------|---------------|
| RV2975D*  | 445                 | 5    | <b>440</b>    | 0             |
| RV1124F^  | 216                 | 0    | 23            | <b>193</b>    |
| RV1126F*  | 255                 | 0    | <b>255</b>    | 0             |
| RV2977F^  | 180                 | 0    | 0             | <b>180</b>    |
| RV1127F*  | 1,089               | 0    | <b>1,089</b>  | 0             |
| RV1128F*  | 157                 | 0    | <b>157</b>    | 0             |
| RV2984F*  | 613                 | 0    | <b>613</b>    | 0             |
| RV2976F^  | 214                 | 0    | 24            | <b>190</b>    |
| RV2979F^  | 539                 | 0    | 37            | <b>502</b>    |
| RV2980F^  | 110                 | 0    | 0             | <b>110</b>    |
| RV2981F^  | 758                 | 0    | 53            | <b>705</b>    |
| RV2982F^  | 546                 | 0    | 47            | <b>499</b>    |
| RV2983F*  | 916                 | 0    | <b>916</b>    | 0             |
| RV3162F^  | 662                 | 0    | 7             | <b>655</b>    |
| RV3163D^  | 283                 | 0    | 4             | <b>279</b>    |
| sub5790F^ | 580                 | 0    | 4             | <b>576</b>    |
| sub5791D^ | 2009                | 0    | 18            | <b>1991</b>   |
| sub5792F^ | 368                 | 0    | 2             | <b>366</b>    |
| RV3160F^  | 722                 | 0    | 3             | <b>719</b>    |
| RV3161D^  | 164                 | 0    | 0             | <b>164</b>    |
| RV3166F*  | 127                 | 2    | <b>125</b>    | 0             |
| RV1145F   | 133                 | 0    | <b>133</b>    | 0             |
| RV1144F   | 356                 | 2    | <b>354</b>    | 0             |

|         |       |   |              |   |
|---------|-------|---|--------------|---|
| RV1129F | 89    | 0 | <b>89</b>    | 0 |
| RV1136D | 289   | 1 | <b>288</b>   | 0 |
| RV1137D | 356   | 0 | <b>356</b>   | 0 |
| RV1142D | 1,078 | 3 | <b>1,075</b> | 0 |
| RV1133D | 2,833 | 8 | <b>2,825</b> | 0 |
| RV1134D | 1,451 | 4 | <b>1,447</b> | 0 |
| RV201RD | 1904  | 6 | <b>1898</b>  | 0 |

For each sequence the read depth at position 3192 is shown alongside the number of reads that have 5As and 6As. Colour coded as Table 1, clade 1(\*) and clade 2(^) and bold denotes the majority (consensus) population.
