# Supplementary material for: Genetic analysis of a rabies virus host shift event reveals within-host viral dynamics in a new host
Source: PubMed Central journal article supplement — Virus Evol. 2017 Dec 13;3(2):vex038. doi: 10.1093/ve/vex038 (PMC5729694; doi:10.1093/ve/vex038), 2017-12-13
Supplement: vex038_supp_st_4.pdf [file vex038_supp_st_4.pdf]

**Table S4: Deep sequence data for position 5348, a homopolymeric region of either 7 or 8 As in the G-L intergenic region.**

| RABV ID   | Read depth coverage | 7 A's        | 8 A's      | 9 As |
|-----------|---------------------|--------------|------------|------|
| RV2984F*  | 833                 | <b>814</b>   | 19         | 0    |
| RV1127F*  | 1,0156              | <b>995</b>   | 21         | 0    |
| RV2981F^  | 1,399               | <b>1,372</b> | 27         | 0    |
| RV2979F^  | 493                 | <b>347</b>   | 146        | 0    |
| RV2982F^  | 592                 | <b>563</b>   | 29         | 0    |
| sub5791D^ | 2,359               | <b>2,312</b> | 47         | 0    |
| sub5792F^ | 434                 | 6            | <b>373</b> | 55   |
| RV3162F^  | 887                 | <b>876</b>   | 11         | 0    |
| RV3160F^  | 942                 | 8            | <b>838</b> | 104  |
| RV1142D   | 1,417               | <b>1,402</b> | 15         | 0    |
| RV1133D   | 3,812               | <b>3,772</b> | 40         | 0    |
| RV1134D   | 1,831               | <b>1,811</b> | 20         | 0    |

For each sequence where heterogeneity was observed in the sub-consensus data the read depth at position 5348 is shown alongside the number of reads that have 7-9As. Colour coded as Table 1, clade 1(\*) and clade 2(^) and bold denotes the majority (consensus) population.
