# Supplementary material for: Genetic analysis of a rabies virus host shift event reveals within-host viral dynamics in a new host
Source: PubMed Central journal article supplement — Virus Evol. 2017 Dec 13;3(2):vex038. doi: 10.1093/ve/vex038 (PMC5729694; doi:10.1093/ve/vex038), 2017-12-13
Supplement: vex038_supp_st_5.pdf [file vex038_supp_st_5.pdf]

**Table S5: SNPs distinguishing clade 1 and 2 within host shift virus dataset across the concatenated genes.**

| Gene          | N   |     |     | P    |      | G    |      |      |      |             |      |             | L    |      |      |      |      |      |      |      |      |      |             |              |       |       |
|---------------|-----|-----|-----|------|------|------|------|------|------|-------------|------|-------------|------|------|------|------|------|------|------|------|------|------|-------------|--------------|-------|-------|
| Position (nt) | 129 | 297 | 639 | 1503 | 2179 | 3027 | 3057 | 3084 | 3204 | <u>3976</u> | 4173 | <u>4327</u> | 5163 | 5577 | 5598 | 6312 | 6729 | 7050 | 8166 | 8223 | 8430 | 8457 | <u>8984</u> | <u>10111</u> | 10335 | 10524 |
| Position (aa) | 43  | 99  | 213 | 50   | 276  | 57   | 67   | 76   | 116  | <u>378</u>  | 439  | <u>491</u>  | 244  | 382  | 389  | 627  | 766  | 873  | 1245 | 1264 | 1333 | 1342 | <u>1518</u> | <u>1894</u>  | 1968  | 2031  |
| Clade 1 nt    | CTA | AAA | TTT | CCT  | CTA  | CTT  | GTT  | AAC  | GCG  | <u>GIG</u>  | CTT  | <u>CGC</u>  | CTT  | CTG  | GTT  | AGA  | ATC  | GTT  | TCT  | ATC  | CAG  | AAA  | <u>ACG</u>  | <u>AGC</u>   | ATT   | AAC   |
| Clade 1 aa    | Leu | Lys | Phe | Pro  | Leu  | Leu  | Val  | Asn  | Ala  | <u>Val</u>  | Leu  | <u>Arg</u>  | Leu  | Leu  | Val  | Arg  | Ile  | Val  | Ser  | Ile  | Gln  | Lys  | <u>Thr</u>  | <u>Ser</u>   | Ile   | Asn   |
| Clade 2 nt    | CTG | AAG | TTC | CCC  | TTA  | CTC  | GTC  | AAT  | GCA  | <u>ATG</u>  | CTC  | <u>AGC</u>  | CTC  | CTT  | GTC  | AGG  | ATA  | GTC  | TCC  | ATT  | CAA  | AAG  | <u>ATG</u>  | <u>GGC</u>   | ATC   | AAT   |
| Clade 2 aa    | *   | *   | *   | *    | *    | *    | *    | *    | *    | <u>Met</u>  | *    | <u>Ser</u>  | *    | *    | *    | *    | *    | *    | *    | *    | *    | *    | <u>Met</u>  | <u>Gly</u>   | *     | *     |

Positions (nt) relate to concatenated sequences.

Positions (aa) relate to the individual protein residues.

Synonymous changes are indicated by \*, non-synonymous changes are underlined.
