# Supplementary material for: Genetic analysis of a rabies virus host shift event reveals within-host viral dynamics in a new host
Source: PubMed Central journal article supplement — Virus Evol. 2017 Dec 13;3(2):vex038. doi: 10.1093/ve/vex038 (PMC5729694; doi:10.1093/ve/vex038), 2017-12-13
Supplement: vex038_supp_st_6.pdf [file vex038_supp_st_6.pdf]

**Table S6: All virus samples with H Index and Entropy scores to compare the relative heterogeneity between viruses over time.**

| ID             | Area           | Year        | Viral Reads   | Heterogeneity Index | Shannon Entropy |
|----------------|----------------|-------------|---------------|---------------------|-----------------|
| RV2975D        | Izmir          | 1999        | 48,801        | 713 (710)           | 542             |
| <u>RV1124F</u> | <u>Izmir</u>   | <u>1999</u> | <u>17,010</u> | <u>1052 (1044)</u>  | <u>742</u>      |
| RV1126F        | Izmir          | 2001        | 27,740        | 1327                | 946             |
| RV1127F        | Manisa         | 2001        | 125,950       | 1214                | 879             |
| <u>RV1128F</u> | <u>Manisa</u>  | <u>2001</u> | <u>15,435</u> | <u>641</u>          | <u>414</u>      |
| RV2976F        | Denizli        | 2004        | 30,993        | 1712                | 957             |
| <u>RV2977F</u> | <u>Izmir</u>   | <u>2006</u> | <u>20,791</u> | <u>774</u>          | <u>533</u>      |
| RV2984F        | Izmir          | 2007        | 45,162        | 1841                | 879             |
| <u>RV2979F</u> | <u>Kutahya</u> | <u>2008</u> | <u>31,332</u> | <u>766</u>          | <u>600</u>      |
| <u>RV2980F</u> | <u>Manisa</u>  | <u>2009</u> | <u>10,845</u> | <u>740</u>          | <u>476</u>      |
| RV2981F        | Izmir          | 2010        | 113,385       | 955                 | 748             |
| RV2982F        | Ankara         | 2012        | 54,074        | 1048                | 529             |
| <u>RV2983F</u> | <u>Manisa</u>  | <u>2012</u> | <u>11,565</u> | <u>427 (426)</u>    | <u>332</u>      |
| RV3162F        | Aksaray        | 2014        | 77,904        | 995                 | 808             |
| RV3163D        | Aksaray        | 2014        | 30,321        | 635                 | 488             |
| Sub5790F       | Cubuk          | 2015        | 79,651        | 963                 | 807             |
| Sub5791D       | Cubuk          | 2015        | 318,799       | 1144                | 940             |
| Sub5792F       | Yahsiyan       | 2014        | 43,663        | 503                 | 378             |
| RV3160F        | Eregli         | 2015        | 95,237        | 801                 | 552             |
| <u>RV3161D</u> | <u>Eregli</u>  | <u>2015</u> | <u>21,225</u> | <u>442</u>          | <u>333</u>      |
| <u>RV3166F</u> | <u>Boztepe</u> | <u>2015</u> | <u>11,945</u> | <u>688</u>          | <u>429</u>      |
| <u>RV1145F</u> | <u>Erzurum</u> | <u>2000</u> | <u>13,552</u> | <u>1493</u>         | <u>773</u>      |
| RV1144F        | Erzurum        | 2001        | 33,268        | 415                 | 252             |
| <u>RV1129F</u> | <u>Erzurum</u> | <u>2001</u> | <u>8,408</u>  | <u>384</u>          | <u>259</u>      |
| RV1136D        | Bursa          | 2001        | 27,835        | 673                 | 446             |
| RV1137D        | Bursa          | 2001        | 43,891        | 501                 | 338             |
| RV1142D        | Istanbul       | 2001        | 140,830       | 547                 | 417             |
| RV1133D        | Ardahan        | 2001        | 450,449       | 873                 | 632             |
| RV1134D        | Ardahan        | 2001        | 169,262       | 617                 | 465             |

Numbers in brackets refer to the same data set analysed on a second occasion (except RV1124F where the same virus was sequenced on independent runs before analysis). Early phase fox samples (green), late phase fox and dog samples (red) and non-host shift viruses (blue). Underlined viruses <25,000 viral reads these data were not included in the final dataset for heterogeneity analysis.
