# Supplementary figures and images for: Genetic analysis of a rabies virus host shift event reveals within-host viral dynamics in a new host
Source: PubMed Central journal article supplement — Virus Evol. 2017 Dec 13;3(2):vex038. doi: 10.1093/ve/vex038 (PMC5729694; doi:10.1093/ve/vex038), 2017-12-13

Fig S4: Comparison of Heterogeneity Index Shannon Entropy for all viruses with >25,000 reads.

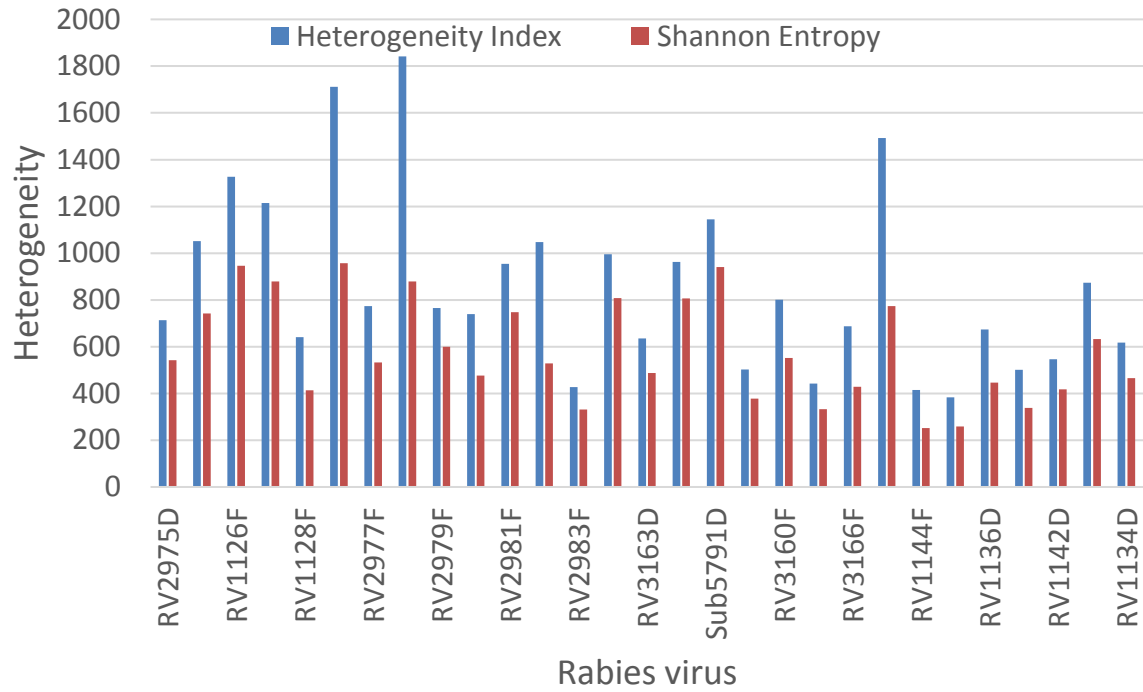

Supplement: vex038_supp_sf_4.pdf [file vex038_supp_sf_4.pdf]
